# Supplementary material for: Structural Assembly of Mink Enteritis Virus and Its Evolutionary Relationship Among Mammalian Parvoviruses
Source: Research Square preprint supplement (doi:10.21203/rs.3.rs-6286741/v1), 2025-05-05
Supplement: Supplementary file 1 [file e5a124d3625e179293a82cb1.docx]

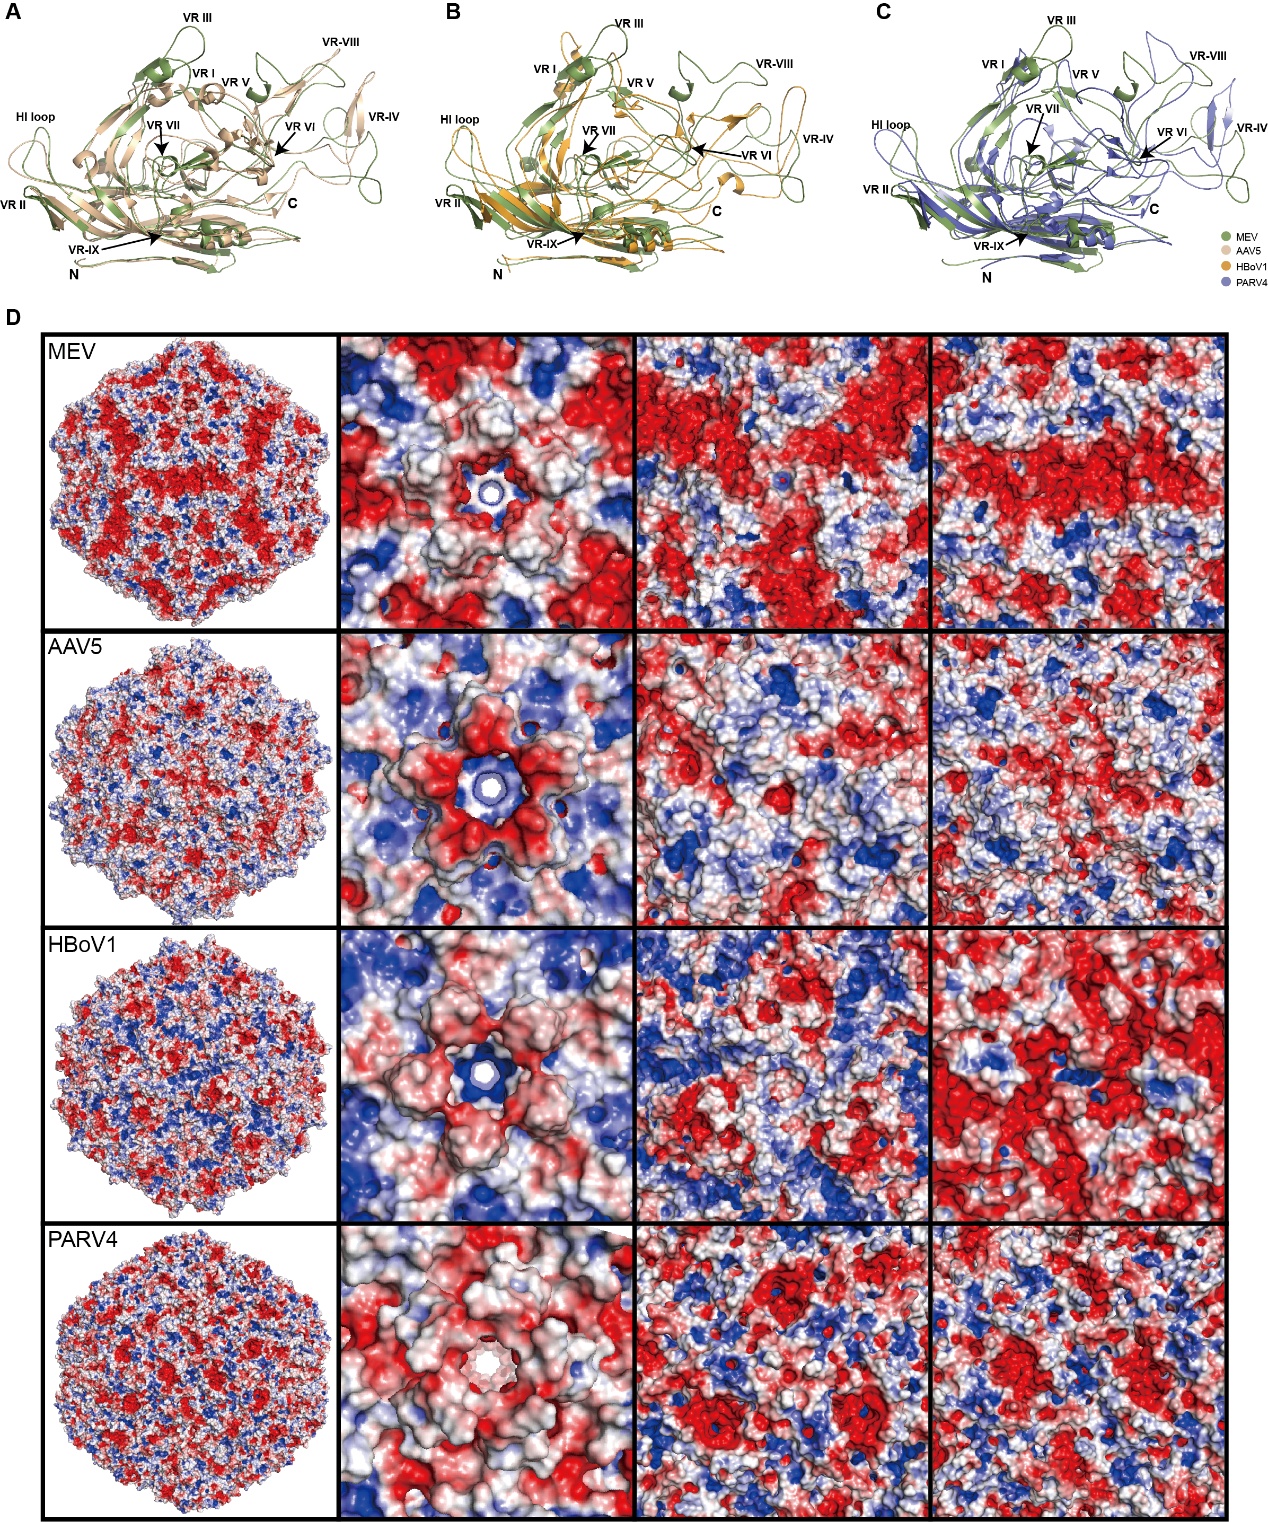


Figure S1 Structural comparison of MEV and other *Parvovirinae* members. (A) Superposition of MEV and AAV5 capsid structures, highlighting the variable region, N-terminus, and C-terminus. (B) Superposition of MEV and HBoV1 capsid structures. (C) Superposition of MEV and PARV4 capsid structures. (D) Comparison of surface electrostatic potentials among MEV, AAV5, HBoV1, and PARV4.
